# Supplementary figures and images for: Cortical response states for enhanced sensory discrimination
Source: eLife journal article supplement (doi:10.7554/elife.29226), 2017-12-23

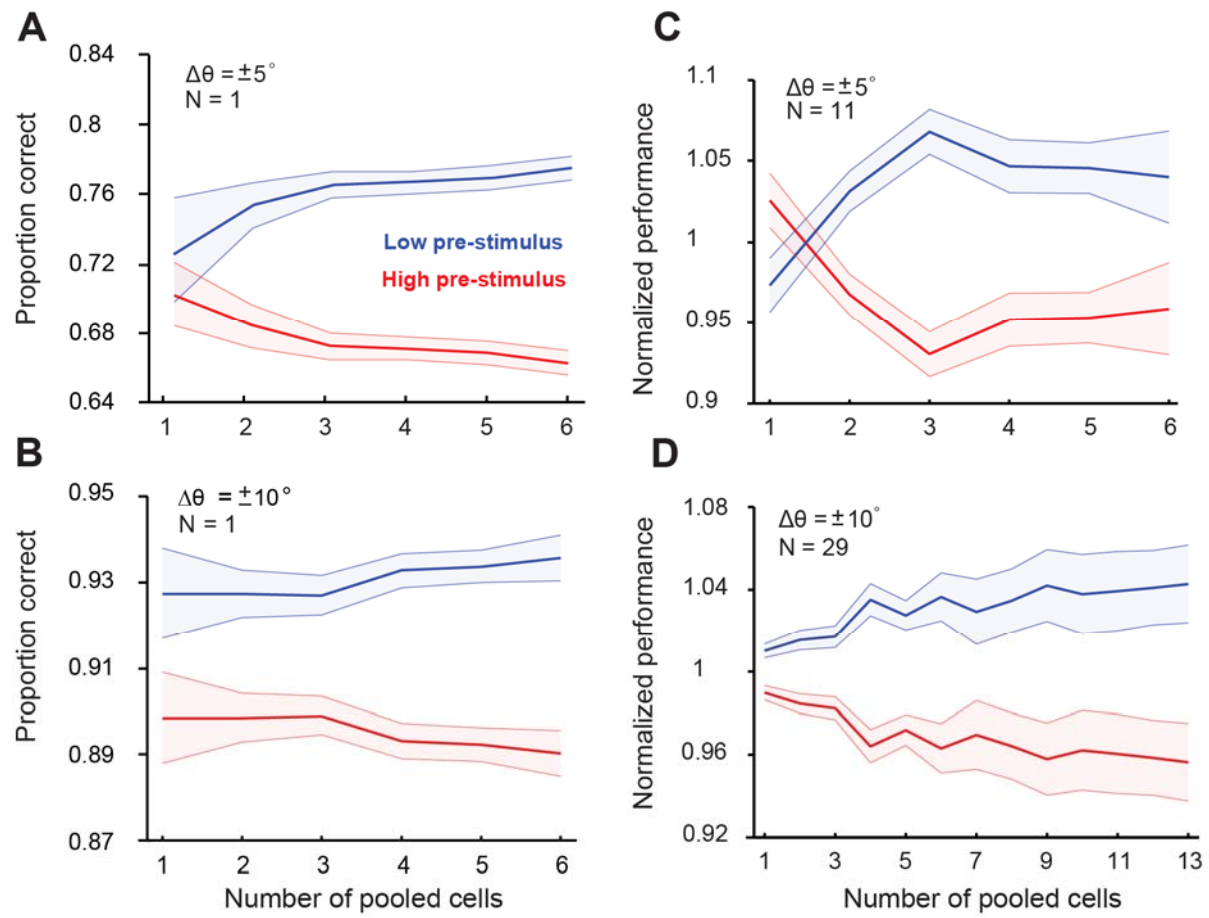

Figure 3 – figure supplement 1

Supplement: supp [file elife-29226-supp-v1.zip]

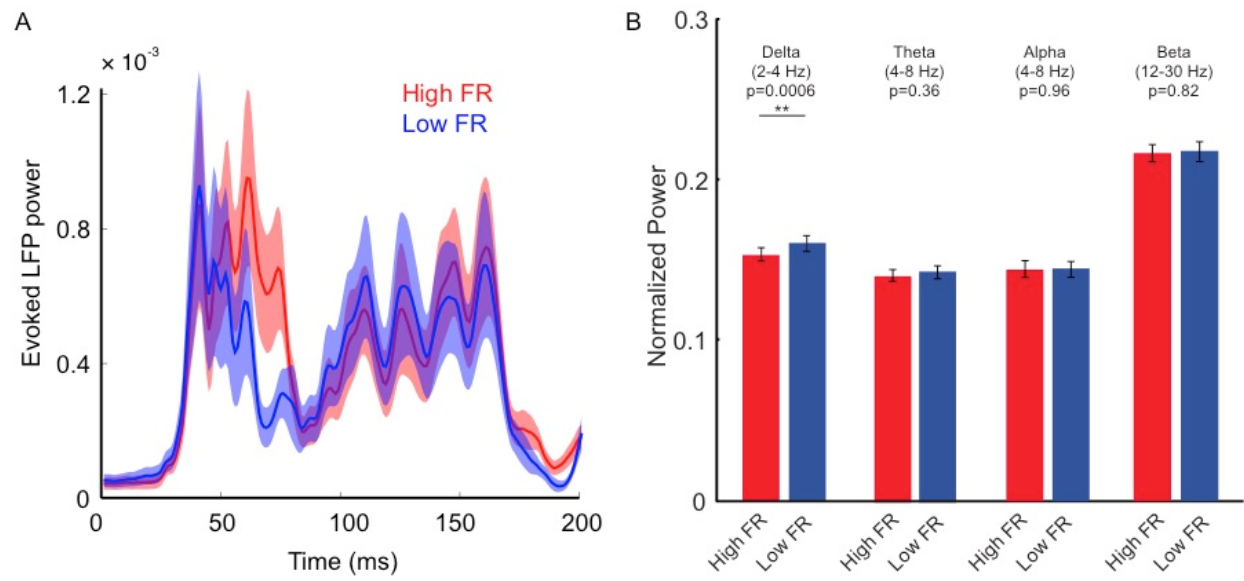

**Figure 3 – figure supplement 6**

Supplement: supp [file elife-29226-supp-v1.zip]

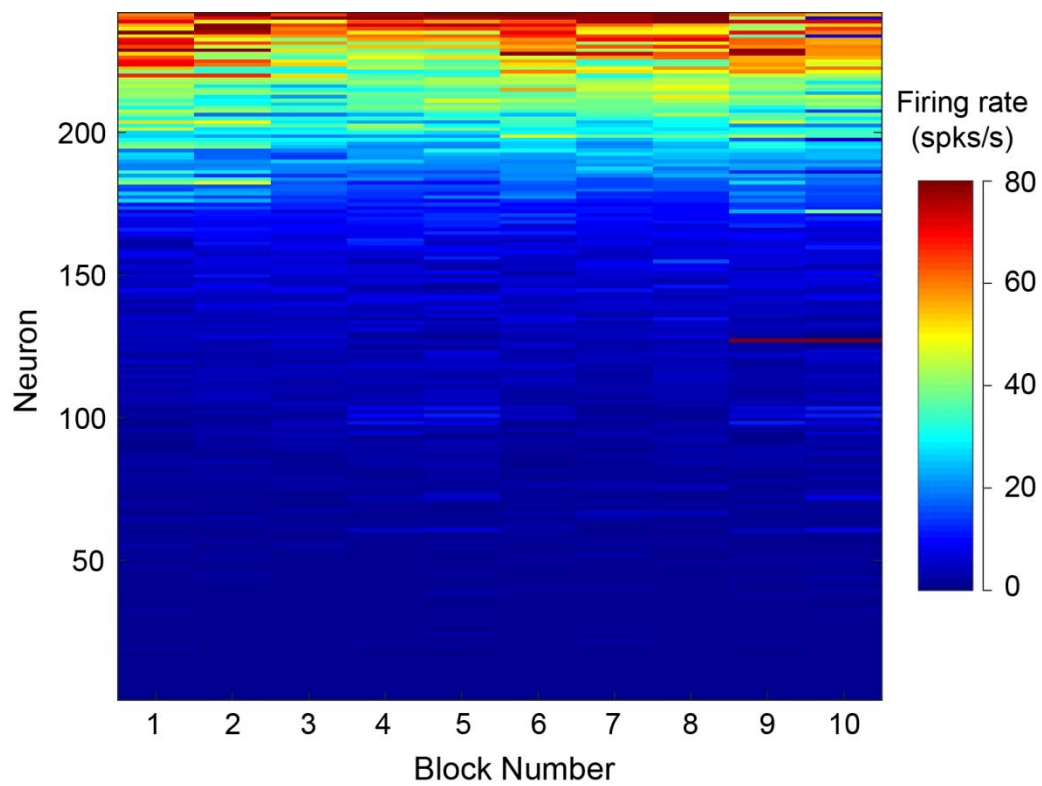

**Figure 1 – figure supplement 2**

Supplement: supp [file elife-29226-supp-v1.zip]

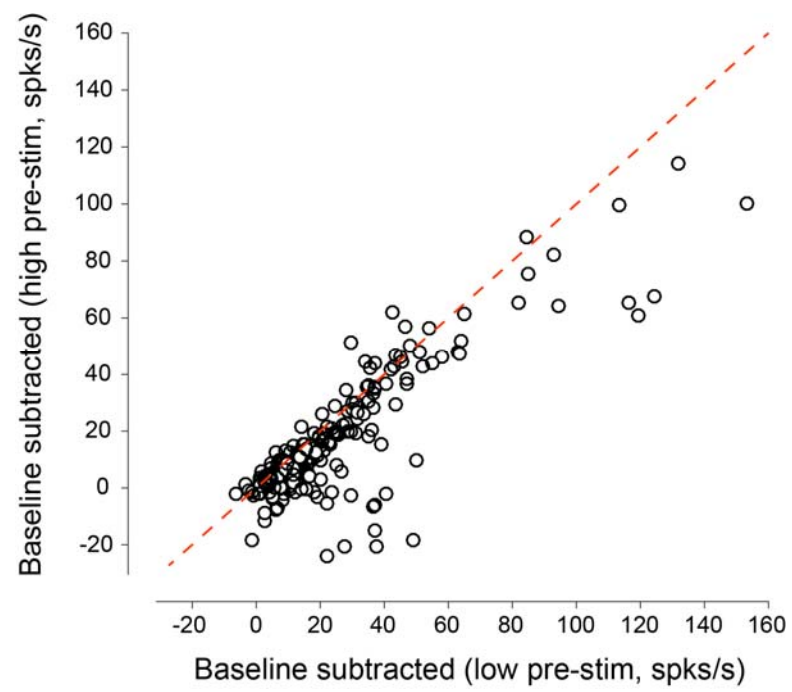

**Figure 1 – figure supplement 4**

Supplement: supp [file elife-29226-supp-v1.zip]

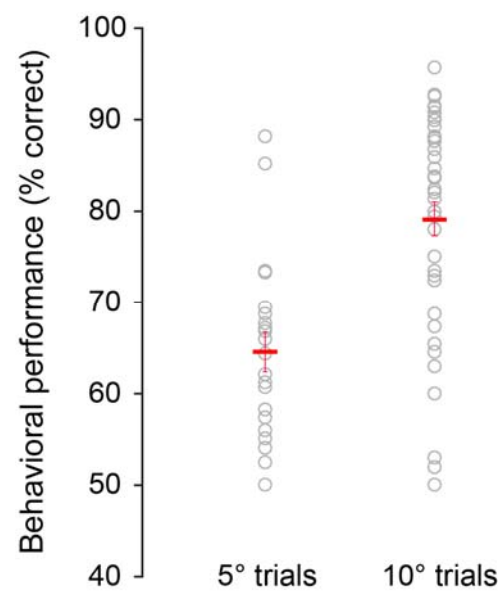

**Figure 3 – figure supplement 3**

Supplement: supp [file elife-29226-supp-v1.zip]

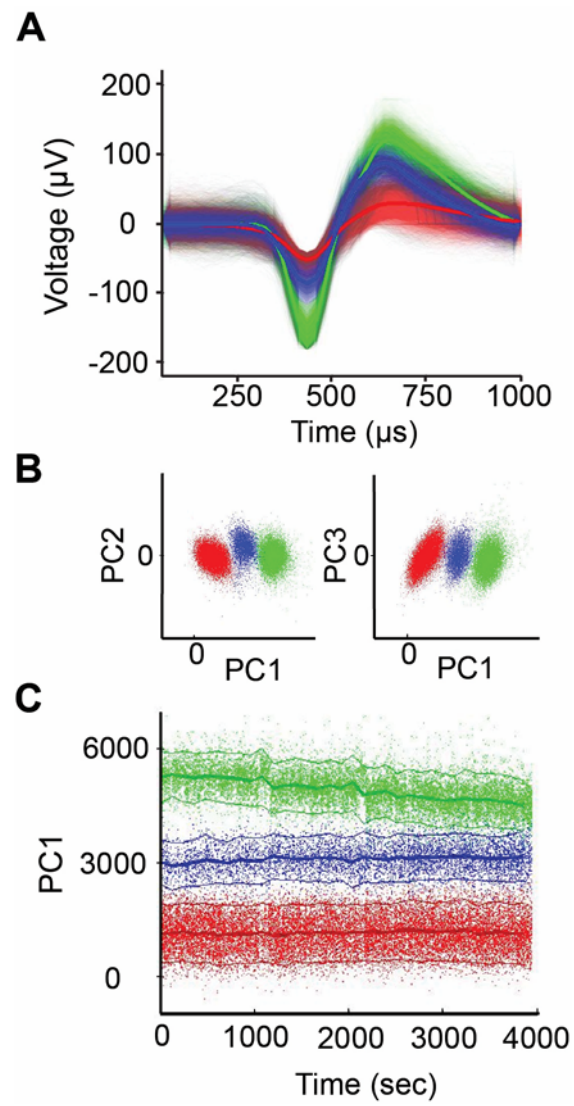

**Figure 1 – figure supplement 1**

Supplement: supp [file elife-29226-supp-v1.zip]

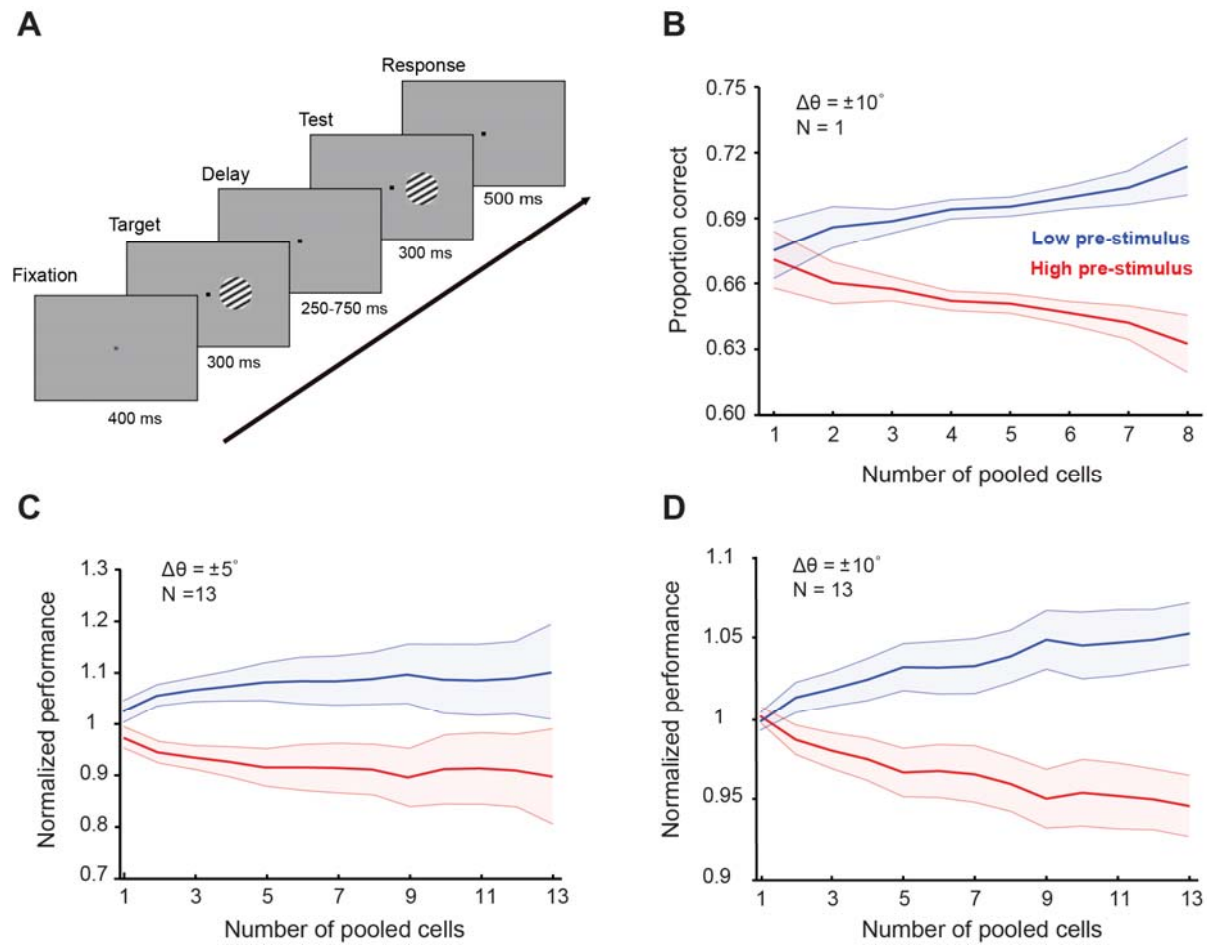

**Figure 3 – figure supplement 4**

Supplement: supp [file elife-29226-supp-v1.zip]

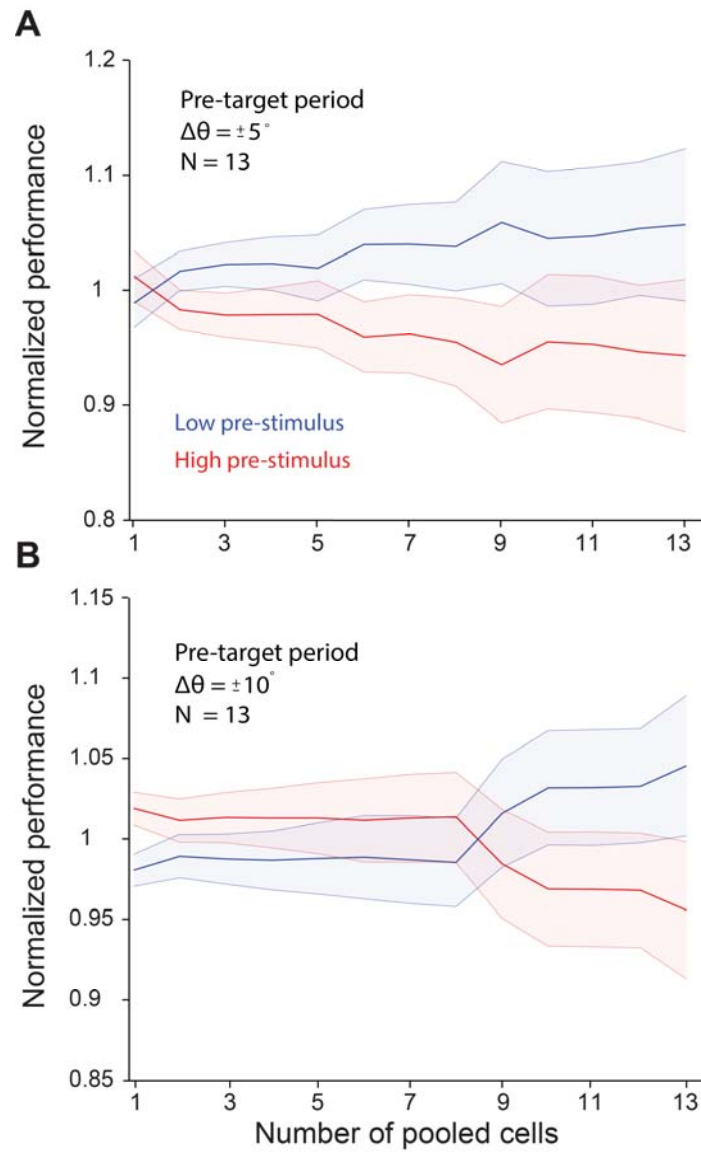

**Figure 3 – figure supplement 5**

Supplement: supp [file elife-29226-supp-v1.zip]

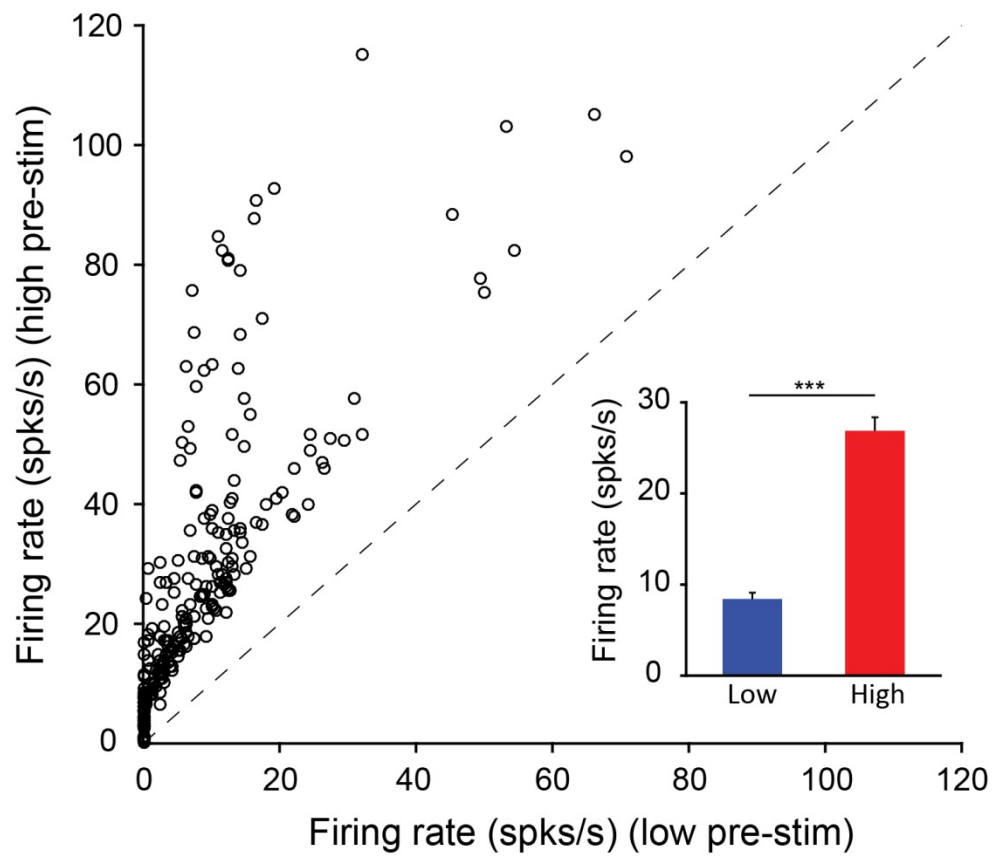

**Figure 1 – figure supplement 3**

Supplement: supp [file elife-29226-supp-v1.zip]

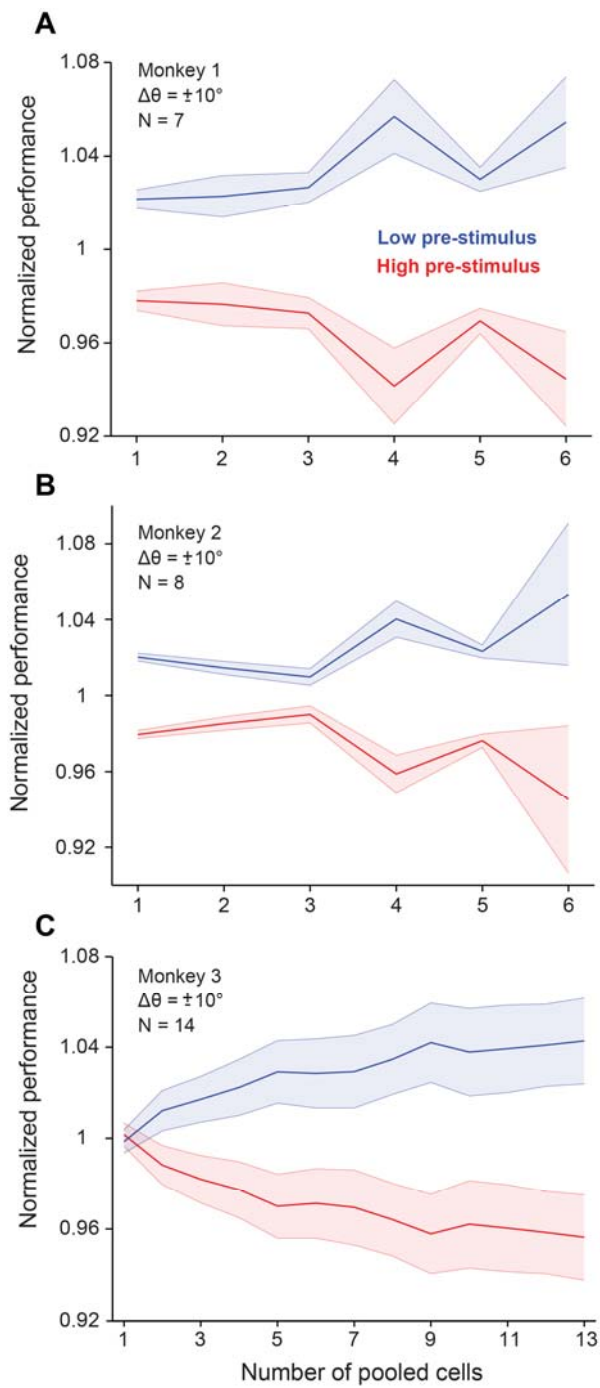

**Figure 3 – figure supplement 2**

Supplement: supp [file elife-29226-supp-v1.zip]

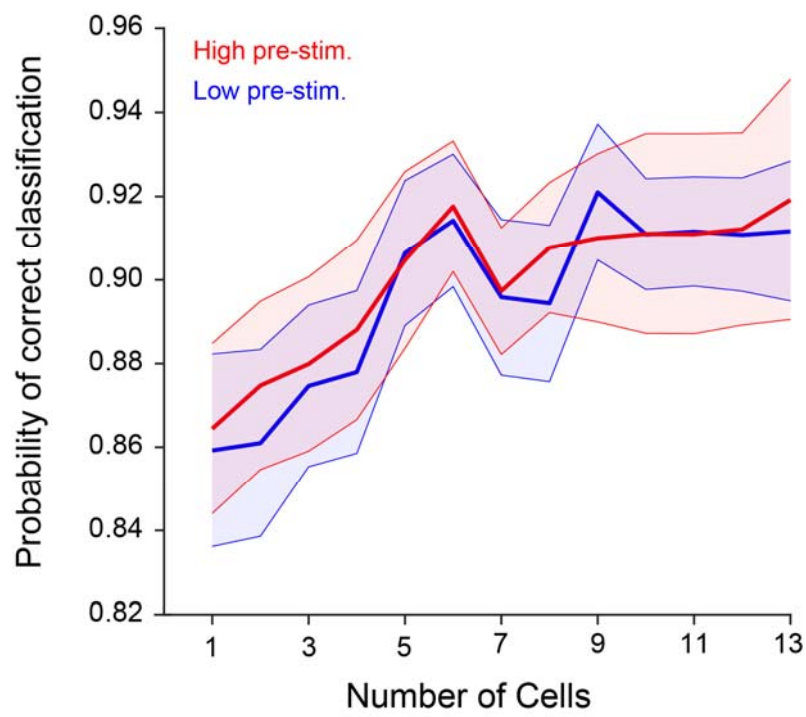

**Figure 5 – figure supplement 1**

Supplement: supp [file elife-29226-supp-v1.zip]
